# Supplementary material for: Synthesis and optical properties of a LiCaY(MoO4)3:Eu3+ red phosphor with negligible concentration quenching for highly efficient white LED and plant growth applications
Source: Royal Society of Chemistry journal article supplement (doi:10.1039/d5dt01050k), 2025-01-01
Supplement: d5dt01050k1.pdf [file d5dt01050k1.pdf]

**Synthesis and optical properties of  $\text{LiCaY}(\text{MoO}_4)_3\text{:Eu}^{3+}$  red phosphor with negligible concentration quenching for highly efficient white LED and plant growth applications**

Priyansha Sharma<sup>a</sup>, Jaya Prakash Madda<sup>a</sup> and Sivakumar Vaidyanathan<sup>b\*</sup>

<sup>a</sup> Department of Chemistry, National Institute of Technology Rourkela - 769 008, Odisha, India.

<sup>b</sup> Department of Chemistry, Indian Institute of Technology Hyderabad, Sangareddy, Kandi, Telangana 502285, India.

---

\* To whom correspondence should be addressed. Email: [vsiva@chy.iith.ac.in](mailto:vsiva@chy.iith.ac.in) (Sivakumar Vaidyanathan).

## Characterization

The phase formation and purity of the phosphors were analyzed using powder X-ray diffractometer (RIGAKU, JAPAN & ULTIMA -IV) which utilizes Cu-K $\alpha$ 1 radiation for generation of X-rays. The SEM images were taken by JEOL JSM 6480LV scanning electron microscope. The FTIR was carried out in the range of 400 - 4000 cm<sup>-1</sup> by Shimadzu, IR Prestige-21, an Automatic infrared microscope. The PL (excitation and emission) spectra and lifetime were monitored by using an Edinburgh Spectrofluorometer FS-5 instrument with attached SC-10 and SC-30 integrating sphere modules. A pulsed xenon lamp was used as the excitation source, and the signals were detected with a photomultiplier. Time-resolved PL and Temperature-dependent PL spectra were measured by using the spectrometer (HORIBA) equipped with a temperature controller. The Commission International de'Eclairage (CIE) color coordinates were calculated from CIE 1931 software. The CRI and color purity were calculated by color calculator software. All the measurements have been carried out at room temperature (RT).

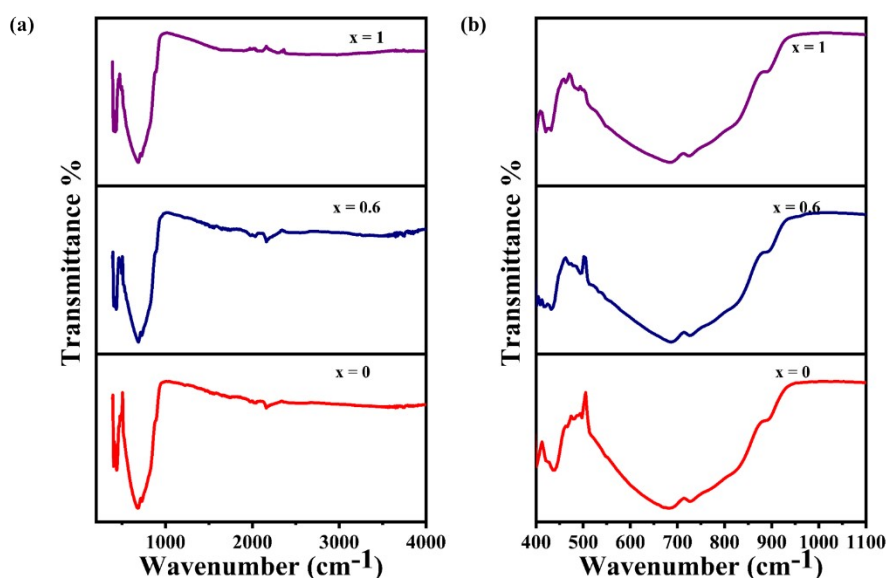

**Figure S1:** a) The FT-IR spectrum of LiCaYEu(MoO<sub>4</sub>)<sub>3</sub> from ( $x = 0, 0.6$ , and  $1$ ) and  
b) Enlarged FT-IR spectra of LiCaYEu(MoO<sub>4</sub>)<sub>3</sub> from (400-1100) cm<sup>-1</sup>

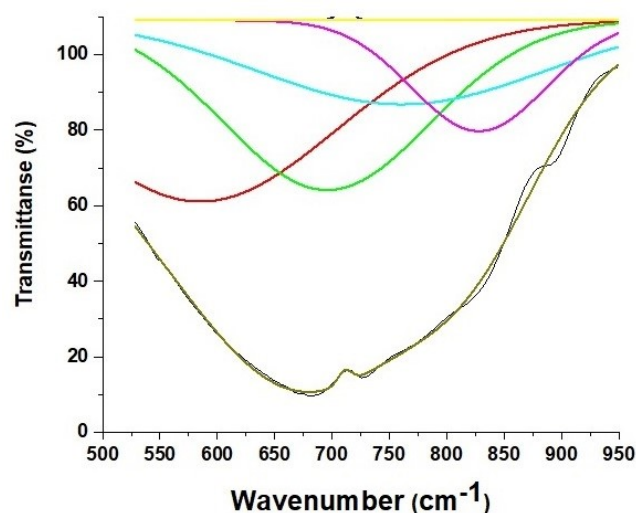

**Figure S2:** The FT-IR spectrum peak deconvolution for  $x = 0$ .

**Table ST1:** Deconvolution peak data for  $x = 0$ .

| Model           | Gaussian                                                                                                |                          |                        |                           |                            |                        |
|-----------------|---------------------------------------------------------------------------------------------------------|--------------------------|------------------------|---------------------------|----------------------------|------------------------|
| Equation        | $y = y_0 + A/(w \cdot \sqrt{\pi/(4 \cdot \ln(2))}) \cdot \exp(-4 \cdot \ln(2) \cdot (x - x_c)^2 / w^2)$ |                          |                        |                           |                            |                        |
| Plot            | Peak1(B)                                                                                                | Peak2(B)                 | Peak3(B)               | Peak4(B)                  | Peak5(B)                   | Peak6(B)               |
| y0              | 109.09446 ± 3757.82364                                                                                  | 109.09446 ± 3757.82364   | 109.09446 ± 3757.82364 | 109.09446 ± 3757.82364    | 109.09446 ± 3757.82364     | 109.09446 ± 3757.82364 |
| xc              | 585.05514 ± 264045.6067                                                                                 | 695.83663 ± 28765.54281  | 711.0506 ± 2.35764     | 760.32304 ± 1782008.76328 | 827.90097 ± 58.36272       | 947.2121 ± 0           |
| A               | -14251.52611 ± 7.0464E7                                                                                 | -10106.71847 ± 6.23666E7 | 56.55687 ± 30.06084    | -6959.29072 ± 1.36694E8   | -4322.79302 ± 847025.42382 | -4070719.24535 ± 0     |
| w               | 278.90591 ± 52794.58278                                                                                 | 211.1359 ± 114665.47757  | 14.82669 ± 6.59723     | 293.49839 ± 1077020.8938  | 138.34812 ± 2436.06347     | 0.00626 ± 0            |
| Reduced Chi-Sqr | 2.39706                                                                                                 |                          |                        |                           |                            |                        |
| R-Square (COD)  | 0.99691                                                                                                 |                          |                        |                           |                            |                        |
| Adj. R-Square   | 0.9963                                                                                                  |                          |                        |                           |                            |                        |

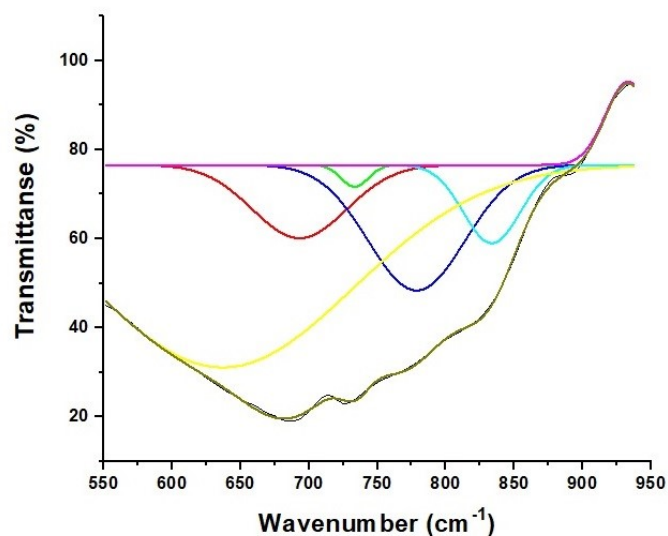

**Figure S3:** The FT-IR spectrum peak deconvolution for  $x = 0.6$ .

**Table ST2:** Deconvolution peak data for  $x = 0.6$ .

| Model           | Gaussian                                                                                                |                       |                         |                        |                       |                           |
|-----------------|---------------------------------------------------------------------------------------------------------|-----------------------|-------------------------|------------------------|-----------------------|---------------------------|
| Equation        | $y = y_0 + A/(w \cdot \sqrt{\pi/(4 \cdot \ln(2))}) \cdot \exp(-4 \cdot \ln(2) \cdot (x - x_c)^2 / w^2)$ |                       |                         |                        |                       |                           |
| Plot            | Peak1(B)                                                                                                | Peak2(B)              | Peak3(B)                | Peak4(B)               | Peak5(B)              | Peak6(B)                  |
| y0              | 76.56623 ± 4.29762                                                                                      | 76.56623 ± 4.29762    | 76.56623 ± 4.29762      | 76.56623 ± 4.29762     | 76.56623 ± 4.29762    | 76.56623 ± 4.29762        |
| xc              | 693.1733 ± 10.89213                                                                                     | 733.51695 ± 1.12013   | 778.75403 ± 3.10729     | 833.66886 ± 2.20902    | 933.21055 ± 1.18034   | 636.93074 ± 30.1082       |
| A               | -1423.19258 ± 1604.02166                                                                                | -123.82694 ± 54.09814 | -2492.6355 ± 1215.74239 | -915.14118 ± 540.47107 | 774.90708 ± 185.27036 | -10934.51476 ± 5301.50176 |
| w               | 81.31392 ± 22.45041                                                                                     | 23.76644 ± 4.40994    | 83.05262 ± 21.69228     | 48.90102 ± 6.74645     | 38.96323 ± 3.7766     | 225.80744 ± 64.20017      |
| Reduced Chi-Sqr | 0.28823                                                                                                 |                       |                         |                        |                       |                           |
| R-Square (COD)  | 0.9995                                                                                                  |                       |                         |                        |                       |                           |
| Adj. R-Square   | 0.99938                                                                                                 |                       |                         |                        |                       |                           |

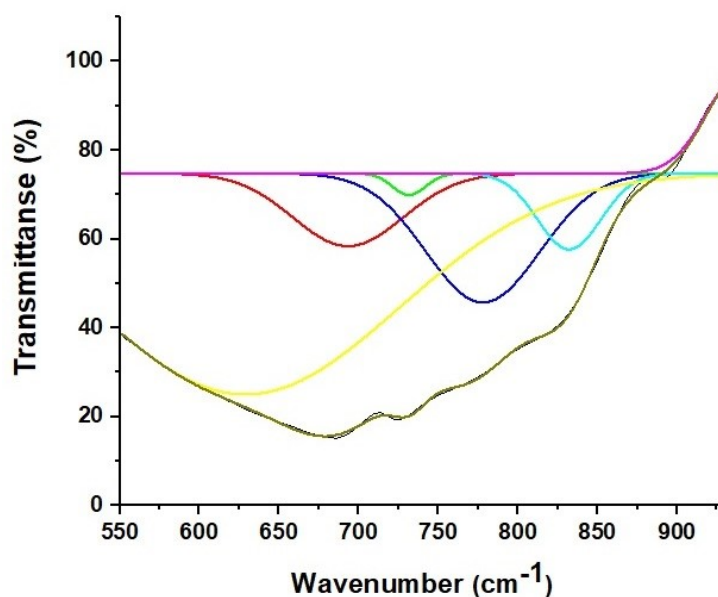

**Figure S4:** The FT-IR spectrum peak deconvolution for  $x = 1$ .

**Table ST3:** Deconvolution peak data for  $x = 1$ .

| Model           | Gaussian                                                               |                           |                             |                            |                            |                            |
|-----------------|------------------------------------------------------------------------|---------------------------|-----------------------------|----------------------------|----------------------------|----------------------------|
| Equation        | $y = y_0 + A/(w*\sqrt{\pi/(4*\ln(2))}) * \exp(-4*\ln(2)*(x-xc)^2/w^2)$ |                           |                             |                            |                            |                            |
| Plot            | Peak1(B)                                                               | Peak2(B)                  | Peak3(B)                    | Peak4(B)                   | Peak5(B)                   | Peak6(B)                   |
| y0              | $74.79999 \pm 4.72014$                                                 | $74.79999 \pm 4.72014$    | $74.79999 \pm 4.72014$      | $74.79999 \pm 4.72014$     | $74.79999 \pm 4.72014$     | $74.79999 \pm 4.72014$     |
| xc              | $693.38467 \pm 12.3521$                                                | $731.68474 \pm 1.46231$   | $778.0182 \pm 2.75968$      | $832.22172 \pm 2.13534$    | $940.1967 \pm 1.16961$     | $628.9101 \pm 27.26028$    |
| A               | $-1420.64913 \pm 1746.27985$                                           | $-127.56763 \pm 67.99594$ | $-2607.4187 \pm 1315.14069$ | $-854.31157 \pm 549.71475$ | $1236.39097 \pm 302.07049$ | $-12086.22212 \pm 5622.38$ |
| w               | $81.43591 \pm 25.54266$                                                | $24.69568 \pm 5.51281$    | $84.24147 \pm 26.30759$     | $46.92653 \pm 7.138$       | $51.65742 \pm 4.75141$     | $227.95641 \pm 65.70672$   |
| Reduced Chi-Sqr | 0.40379                                                                |                           |                             |                            |                            |                            |
| R-Square (COD)  | 0.99946                                                                |                           |                             |                            |                            |                            |
| Adj. R-Square   | 0.99935                                                                |                           |                             |                            |                            |                            |

**Table ST4:** Peak positions in all the above spectra for  $x = 0, 0.6$  and  $1$ .

|         | Peak maximum (wavenumber (cm <sup>-1</sup> )) |        |        |        |
|---------|-----------------------------------------------|--------|--------|--------|
|         | Peak-1                                        | Peak-2 | Peak-3 | Peak-4 |
| X = 0   | 695                                           | 711    | 827    | 947    |
| X = 0.6 | 693                                           | 733    | 833    | 933    |
| X = 1   | 693                                           | 731    | 832    | 940    |

**Table. ST5** Electric dipole, magnetic dipole, and Asymmetry ratio of LCYM: Eu<sup>3+</sup> phosphor calculated at ED transition.

| <b>Eu<sup>3+</sup><br/>Concentration</b> | <b>Electric dipole (616nm)<br/><sup>5</sup>D<sub>0</sub>/<sup>7</sup>F<sub>2</sub></b> | <b>Magnetic dipole (592 nm)<br/><sup>5</sup>D<sub>0</sub>/<sup>7</sup>F<sub>1</sub></b> | <b>ED/MD(AR)</b> |
|------------------------------------------|----------------------------------------------------------------------------------------|-----------------------------------------------------------------------------------------|------------------|
| 0.2                                      | 23916040                                                                               | 1481897.63                                                                              | 16.14            |
| 0.4                                      | 44698624                                                                               | 2824559.2                                                                               | 15.82            |
| 0.6                                      | 52117052                                                                               | 3145710.5                                                                               | 16.56            |
| 0.8                                      | 74948728                                                                               | 4441308                                                                                 | 16.87            |
| 1.0                                      | 65623348                                                                               | 3609866.5                                                                               | 18.17            |

**Table. ST6** CIE coordinates, Color purity and Asymmetry ratio of LCYM: Eu<sup>3+</sup> phosphor calculated at ED transition.

| <b>Eu<sup>3+</sup> Concentration</b> | <b>CIE coordinates (x, y)</b> | <b>Colour purity</b> | <b>Asymmetry ratio</b> |
|--------------------------------------|-------------------------------|----------------------|------------------------|
| 0.2                                  | 0.6624, 0.3369                | 95.4%                | 16.13                  |
| 0.4                                  | 0.6663, 0.3331                | 96.4%                | 15.82                  |
| 0.6                                  | 0.6680, 0.3316                | 96.8%                | 16.56                  |
| 0.8                                  | 0.6692, 0.3304                | 97.1%                | 16.87                  |
| 1.0                                  | 0.6699, 0.3297                | 97.3%                | 18.17                  |

**Table. ST7** CIE coordinates and Color purity of LCYM: Eu<sup>3+</sup> phosphor calculated at 299 nm.

| <b>Eu<sup>3+</sup> Concentration</b> | <b>CIE coordinates (x, y)</b> | <b>Colour purity</b> |
|--------------------------------------|-------------------------------|----------------------|
| 0.2                                  | 0.6645, 0.3349                | 95.9%                |
| 0.4                                  | 0.6655, 0.3339                | 96.1%                |
| 0.6                                  | 0.6684, 0.3311                | 96.9%                |
| 0.8                                  | 0.6690, 0.3305                | 97.10%               |
| 1.0                                  | 0.6694, 0.3302                | 97.20%               |

**Table. ST8** CIE coordinates and Color purity of LCYM: Eu<sup>3+</sup> phosphor calculated at 465 nm.

| Eu <sup>3+</sup> Concentration | CIE coordinates (x,y) | Colour purity |
|--------------------------------|-----------------------|---------------|
| 0.2                            | 0.6602,0.3388         | 94.84%        |
| 0.4                            | 0.6637,0.3353         | 95.73%        |
| 0.6                            | 0.6666,0.3327         | 96.48%        |
| 0.8                            | 0.6676,0.3318         | 96.73%        |
| 1.0                            | 0.6685,0.3309         | 96.97%        |

**Table ST9 : Judd – Ofelt Parameters of LiCaY(MoO<sub>4</sub>)<sub>3</sub>:Eu<sup>3+</sup> phosphor (300 nm)**

| Concentration<br>of Eu <sup>3+</sup> | <u>Judd - Ofelt Parameter</u>                       |                                                     | A <sub>0-1</sub> in S <sup>-1</sup> | A <sub>0-2</sub> in S <sup>-1</sup> | A <sub>0-4</sub> in S <sup>-1</sup> |
|--------------------------------------|-----------------------------------------------------|-----------------------------------------------------|-------------------------------------|-------------------------------------|-------------------------------------|
|                                      | Ω <sub>2</sub> (10 <sup>-19</sup> cm <sup>2</sup> ) | Ω <sub>4</sub> (10 <sup>-20</sup> cm <sup>2</sup> ) |                                     |                                     |                                     |
| 0.4                                  | 1.0312                                              | 4.224                                               | 50                                  | 841.45858                           | 166.7669                            |
| 0.6                                  | 1.2146                                              | 4.306                                               | 50                                  | 995.45154                           | 170.0455                            |
| 0.8                                  | 1.1531                                              | 4.559                                               | 50                                  | 945.05709                           | 180.2003                            |
| 1.0                                  | 1.188                                               | 4.716                                               | 50                                  | 970.09486                           | 185.8942                            |
